# Supplementary material for: Sleep and nighttime behavior disorders in older adults: associations with hypercholesterolemia and hypertriglyceridemia at baseline, and a predictive analysis of incident cases at 12 months follow-up
Source: PubMed Central journal article supplement (PMC11439313; doi:10.1186/s12944-024-02302-x), 2024-09-28
Supplement: 12944_2024_2302_MOESM1_ESM.pdf [file 12944_2024_2302_MOESM1_ESM.pdf]

Sleep and nighttime behavior disorders  
in older adults: associations with  
hypercholesterolemia and  
hypertriglyceridemia at baseline and a  
prediction analysis of incidental cases at  
12 months follow-up

*By Asma Hallab*

1       **Sleep and nighttime behavior disorders** <sup>1</sup> **in older adults: associations with**  
2       **hypercholesterolemia and hypertriglyceridemia at baseline and a prediction**  
3       **analysis of incidental cases at 12 months follow-up**

4       Asma Hallab <sup>a,b,c,#</sup>, for the Alzheimer's Disease Neuroimaging Initiative\*

6       **Affiliations**

7       a- Biologie Intégrative et Physiologie – Parcours Neurosciences Cellulaires et Intégrées. **Faculté**  
8       **des Sciences et Ingénierie**. Campus Pierre et Marie Curie. <sup>1</sup> **Sorbonne Université, Paris, France.**

9       b- Pathologies du Sommeil. **Faculté de Médecine**. Hôpital Universitaire **Pitié-Salpêtrière**.  
10       **Sorbonne Université, Paris, France.**

11       c- Charité - Universitätsmedizin Berlin, Corporate member of Freie Universität Berlin and  
12       **Humboldt-Universität zu Berlin**. Institute of Public Health. Berlin, Germany.

15       **Number of words in the abstract:** 275

16       **Number of words in the manuscript:** 3573

17       **Number of tables:** 3

18       **Number of figures:** 3

20       **#Corresponding author:** Dr. med. Dr. Asma Hallab. Charité Universitätsmedizin – Berlin.

21       Charitéplatz 1, 10117 Berlin – Germany. [asma.hallab@charite.de](mailto:asma.hallab@charite.de).

22       <https://orcid.org/0000-0002-3901-7980>

23

24 **Abstract**

25 **Introduction**

26 <sup>13</sup> Sleep disorders, particularly insomnia and obstructive sleep apnea, are associated with  
27 dyslipidemia in the general population. The study's aim was <sup>1</sup> to explore the association  
28 between pathological Cholesterol and Triglyceride levels, and sleep and nighttime behavior  
29 disorders (SNBD) in older adults, whether they might predict SNBD onset, and to emphasize  
30 the role of body mass index (BMI) in this association.

31 <sup>25</sup> **Methods**

32 Alzheimer's Disease Neuroimaging Initiative <sup>2</sup> (ADNI) population with complete Cholesterol,  
33 Triglyceride, SNBD, and neurocognitive data were included. Logistic regression was performed  
34 to study the association between hypercholesterolemia, hypertriglyceridemia, and SNBD at  
35 baseline and 12 months. Relevant confounders, particularly BMI, were adjusted for.

36 **Results**

37 Among the 2,216 included cases, 1,045 (47%) were females, and the median age was 73 years  
38 (IQR: 68, 78). At baseline, 357 (16%) had SNBD and 327 (18%) at 12 months; 187 of them  
39 were incident cases.

40 There were more cases of baseline SNBD in the hypertriglyceridemia group than in those  
41 without (19% vs. 14%,  $P$ -value=0.003). Similarly, more follow-up SNBD cases had  
42 hypertriglyceridemia at baseline (21% vs. 16%,  $P$ -value=0.025). SNBD cases at baseline had  
43 significantly higher serum Triglyceride levels than those without (132 vs. 118mg/dL,  $P$ -  
44 value<0.001).

45 Only hypertriglyceridemia was significantly associated with baseline SNBD (crude OR=1.43,  
46 95%CI: 1.13,1.80,  $P$ -value=0.003), even after adjustment for confounding factors (adj.

47 OR=1.36, 95%CI: 1.06,1.74, P-value=0.016) and (BMI-adj. OR=1.29, 95%CI: 1.00,1.66, P-  
48 value=0.048). None of the dyslipidemia forms did predict incident cases at 12 months.

#### 49 **Conclusions**

50 Hypertriglyceridemia, but not hypercholesterolemia, was associated with higher odds of  
51 SNBD. The association was independent of BMI. None of the dyslipidemia forms predicted  
52 incidental SNBD over 12 months. Sleep disorders should motivate a systematic screening of  
53 dyslipidemia in older adults and vice versa.

54

55 **Keywords:** Sleep, Aging, Dyslipidemia, Triglyceride, Cholesterol, BMI.

56

#### 57 **1. Introduction**

58 Sleep disorders represent a large spectrum of symptoms defining an alteration of sleep  
59 quality, structure, chronobiology, duration, and associated breathing and movement  
60 disorders. (1) Insomnia and sleep obstructive apnea syndrome have a high prevalence  
61 worldwide; both are associated with cardiovascular and neuropsychiatric risk factors and  
62 affected persons are exposed to higher morbidity and mortality rates. (2-5) The incidence of  
63 sleep disorders increases with age. In addition to the physiological decrease in sleep hours  
64 during the aging process; neurodegeneration, neuroendocrine, and sleep disorders define a  
65 more complex bidirectional association. (6) Old patients with sleeping disorders, particularly  
66 insomnia, have higher risks of cognitive decline, and those with cognitive impairment are  
67 more susceptible to progressing into dementia. (7-9) Moreover, elderly patients with  
68 neurocognitive disorders are at higher risk of experiencing neurodegeneration-related sleep  
69 behavior and movement disorders. (10)

70 The relationship between sleep disorders and metabolic and cardiovascular pathologies is  
71 largely reported in the literature. (11, 12) Defined as the association between diabetes,  
72 dyslipidemia, hypertonia, and visceral adiposity, the metabolic syndrome is a well-established  
73 risk factor for cardiovascular disorders and is related to higher morbidity and mortality rates.  
74 (13) Most published studies evaluated sleep disorders quantitatively based on sleep duration  
75 or qualitatively depending on the subjective perception of sleep quality. (14-17) Studies on  
76 sleep disorders objectified by the study partner of older patients and their association with  
77 dyslipidemia are rare. Moreover, there is limited data on whether dyslipidemia might predict  
78 prospectively sleep disorders. It is also unclear how much this association depends on <sup>23</sup>body  
79 mass index (BMI), particularly in older adults. The overall study question was whether  
80 hypercholesterolemia or hypertriglyceridemia, independent of BMI, are associated with <sup>21</sup>sleep  
81 and nighttime behavior disorders (SNBD) in advanced age groups.

82 The aims <sup>3</sup>of this study were (1) to explore the association between dyslipidemia and  
83 informant-perceived SNBD in older adults at baseline, <sup>1</sup>and (2) to evaluate whether  
84 dyslipidemia at baseline might predict incidental cases of SNBD over 12 months of follow-up.

## 85 2. Methods

86 This manuscript has been prepared and reported according to STROBE guidelines. (18)

### 87 • Study population

88 The studied population is part of the Alzheimer's Disease Neuroimaging Initiative (ADNI)  
89 cohort, from which only cases with complete data required for the current analysis were  
90 included. <sup>9</sup>Dr Michael W. Weiner is ADNI's principal investigator. ADNI is a non-interventional  
91 longitudinal study. <sup>1</sup>Study participants are older adults recruited at 59 centers around the

92 United States and Canada, who underwent an observational follow-up where biological,  
93 genetic, neuroimaging, and neuropsychiatric information was assessed at several time points.  
94 Participants from different phases (ADNI 1, go, 2, and 3) were eligible for the current analysis.  
95 <sup>3</sup> The study was performed according to the Declaration of Helsinki and ethical approval was  
96 obtained from the Internal Reviewing Board corresponding to each participating site. <sup>17</sup> Written  
97 consent was obtained from all ADNI study participants. <sup>1</sup> Data, ethical approval, enrollment,  
98 and protocols can be found at <https://adni.loni.usc.edu>.

99 • **Cholesterol and Triglyceride measurements**

100 Serum Cholesterol and Triglyceride levels were assessed at baseline and mainly reported in  
101 mg/dL. Laboratory normal ranges were 0 - 199 mg/dL for Cholesterol and 0 - 149 mg/dL for  
102 Triglyceride. Defect and duplicated measurements were checked for each individual and  
103 removed based on the date and time of the reported result. Serum levels corresponding to  
104 200 mg/dL for Cholesterol and 150 mg/dL for Triglyceride are largely recognized clinical cutoff  
105 values for hypercholesterolemia and hypertriglyceridemia, respectively. (19, 20) Owing to the  
106 larger use of mg/dL as a unit worldwide, values in mmol/L were converted to mg/dL:

107 
$$\text{Cholesterol (mg/dL)} = \text{Cholesterol (mmol/L)} \times 38.67$$

108 
$$\text{Triglycerides (mg/dL)} = \text{Triglycerides (mmol/L)} \times 88.57$$

109 • **Sleep and nighttime behavior disorders**

110 The assessment of SNBD was based on the neuropsychiatric inventory questionnaire (NPI/NPI-  
111 Q) filled by study partners of included participants. (21, 22) The item related to sleep disorders  
112 in NPI/NPI-Q covered the following questions:

113 “Does the patient have difficulty sleeping (do not count as present if the patient simply gets  
114 up once or twice per night only to go to the bathroom and falls back asleep immediately)? Is  
115 he/she up at night? Does he/she wander at night, get dressed, or disturb your sleep? “  
116 If this question was answered with yes, details on the following questions were then collected:  
117 1. “Does the patient have difficulty falling asleep?”  
118 2. “Does the patient get up during the night?”  
119 3. “Does the patient wander, pace, or get involved in inappropriate activities at night?”  
120 4. “Does the patient awaken you during the night?”  
121 5. “Does the patient wake up at night, dress, and plan to go out, thinking that it is morning  
122 and time to start the day?”  
123 6. “Does the patient awaken too early in the morning, earlier than was his/her habit?”  
124 7. “Does the patient sleep excessively during the day?”  
125 8. “Does the patient have any other nighttime behaviors that bother you and we haven’t  
126 talked about?”

127 • **Cognitive tests**

128 Cognition was assessed based on the Alzheimer’s Disease Assessment Score with 13 items  
129 (ADAS<sub>13</sub>), Mini-Mental Status Examination (MMSE) total score, Clinical Dementia Rating (CDR)  
130 total score, CDR-sum of boxes (CDR-SB), and Functional Activities Questionnaire (FAQ) total  
131 score. Moreover, depression symptoms were reported based on the total Geriatric Depression  
132 Scale (GDS) score. People with severe depression were initially excluded from ADNI and  
133 therefore included participants are either non- or mildly depressed. The included cases were  
134 either healthy controls (HC), participants with mild cognitive impairment (MCI), or dementia.

135 • **Body-mass index**

136 Weight and Height data were checked to ensure the plausibility of the values and units.  
137 Weight at baseline was considered and converted to “Kilogram” when the unit of  
138 measurement was “Pounds”:

139 
$$\text{Kilograms} = 2.20462 * \text{Pounds}$$

140 Similarly, height was converted to “Meters” when the unit of measurement was “Inches”:

141 
$$\text{Meters} = 0.0254 * \text{Inches}$$

142 BMI was calculated based on the formula  $\text{weight (Kg) / Height (m)}^2$ . (23)

143 **• Inclusion criteria**

144 After excluding 142 participants without Cholesterol or Triglyceride measurements, 27  
145 without complete NPI/NPI-Q, 21 missing total ADAS<sub>13</sub> and one missing GDS score at baseline,  
146 nine missing baseline main diagnosis, and four missing complete demographic data (age), four  
147 missing weight or height at baseline and six have erroneous measurements or units, a total of  
148 2,216 study participants were included in the analysis (fig. 1A). Among those 371 were lost  
149 to follow-up at 12 months (fig. 1B).

150 **• Statistical analysis**

151 The statistical analysis was performed by RStudio version 2024-04. Continuous data was  
152 reported as median (Inter-quartile range (IQR)) and count data as number (percentage (%)).  
153 Kruskal-Wallis rank sum test and Pearson’s Chi-squared test were performed to compare  
154 groups and for each analysis, the *P*-value was reported. Spearman correlation between serum  
155 Cholesterol, Triglyceride, age, and scores of cognitive tests, was performed and correlation  
156 coefficients were reported. The association between SNBD and dyslipidemia at baseline was  
157 evaluated using logistic regression with SNBD as a dependent binary variable, and



158 dyslipidemia as an independent binary variable. Models were adjusted for age, sex, racial  
159 profile, educational level, GDS total score, APOE ε4 status, main diagnosis related to cognitive  
160 status, and BMI, as follows:

161 **Model 1:** crude logistic regression analysis,

162 **Model 2:** adjusted for age, sex, racial profile, educational level, cognition-related main  
163 diagnosis, geriatric depression scale total score, APOE ε4 status,

164 **Model 3:** model 2 + BMI.

165 Incident cases of SNBD were calculated as new positive cases at 12 months of follow-up,  
166 amongst cases that were negative at baseline. Prediction analysis was based on logistic  
167 regression with SNBD at 12 months follow-up as a dependent binary variable, and  
168 dyslipidemia at baseline as an independent binary variable. The same confounding factors  
169 were adjusted for. For each model odds ratio (OR), 95% confidence interval (CI), and *P*-value  
170 were reported. The statistical significance level was set at 0.05.

### 171 3. Results

#### 172 • Characteristics of the study population

173 <sup>1</sup> Among the 2,216 included cases, 1,045 (47%) were females, and 1,171 (53%) were males. The  
174 median age was 73 (IQR: 68, 78), and 786 (%) were HC, 1,060 (%) had MCI, and 370 (%) were  
175 diagnosed with dementia. The difference in median age between groups was statistically  
176 significant (72, 73, and 75 years, respectively, *P*-value <0.001).

177 At baseline, 357 (16%) study participants had sleep and nighttime behavior disorders,  
178 according to their study partner. At 12 months of follow-up, 327 (18%) participants had  
179 positive sleep disorder scores, among which 187 were incident cases (fig. 1B).

180 The median ADAS<sub>13</sub> total score was 14 (IQR: 9, 22), the median GDS total score was 1.0 (IQR:  
181 0, 2.0), and the median FAQ was 1.0 (IQR: 0, 5.0). Further characteristics of the included cases  
182 are presented in Table 1.

183 • **Comparison between healthy controls, and those with MCI and dementia**

184 Cholesterol levels ranged from 74 to 476 mg/dL, the median in the total population was 191  
185 mg/dL (IQR: 165, 220), 189 mg/dL (IQR: 165, 217) in HC, 191 mg/dL (IQR: 165, 221) in the MCI  
186 group, and 193 mg/dL (IQR: 167, 224) in those with dementia. No statistically significant  
187 difference was found between diagnosis groups ( $P$ -value=0.4). The median Triglyceride level  
188 was 120 mg/dL (IQR: 87, 171) in the main population, and ranges between 32 and 2084  
189 mg/dL. No statistically significant difference was found between diagnostic groups (116, 121,  
190 and 124 mg/dL, respectively,  $P$ -value=0.078). The median BMI of the main population was  
191 26.3 (IQR: 23.9, 29.3), ranging between 17.14 and 51.75, with 19 (0.86%) classified as  
192 underweight, 796 (35.92%) as healthy weight, 930 (41.97%) as overweight, and 471 (21.25%)  
193 as obese. There was a statistically significant difference between BMI medians observed in  
194 different groups (26.7 in HC, 26.3 in MCI, and 25.4 in the dementia group,  $P$ -value <0.001).

195 • **Comparison between study participants with and without dyslipidemia**

196 Based on clinical cutoff values, hypercholesterolemia was diagnosed in 920 cases (41.52%),  
197 and hypertriglyceridemia in 725 cases (32.72%). Details on the differences between groups  
198 are presented in Table 2. BMI was significantly higher in the group without  
199 hypercholesterolemia than in those with (26.7 vs. 25.5,  $P$ -value <0.001). In contrast, BMI was  
200 higher in those with hypertriglyceridemia than in those without (25.7 vs. 27.5,  $P$ -value  
201 <0.001). Very weak correlations were found between hypercholesterolemia and  
202 hypertriglyceridemia with neurocognitive scores (fig. 2A). BMI showed a decreasing tendency  
203 with age, and cases with obesity were significantly younger than those with overweight and

204 those with a healthy weight (fig. 2B). Furthermore, BMI was negatively correlated with serum  
205 Cholesterol levels, and positively correlated with serum Triglyceride levels (fig 2C and 2D).  
206 There was no significant difference in Cholesterol levels between those with SNBD at baseline  
207 and those without (16% vs. 16%,  $P$ -value=0.7). Similar results were also observed at 12  
208 months (17% vs. 18%,  $P$ -value=0.7). Thus, there were more cases of SNBD in the  
209 hypertriglyceridemia group than in those with normal triglyceride (19% vs. 14%,  $P$ -  
210 value=0.003). Similarly, 21% of cases of SNBD at 12 months had hypertriglyceridemia and 16%  
211 had normal triglyceride levels at baseline ( $P$ -value=0.025). Cases with SNBD had higher serum  
212 Cholesterol levels than those without SNBD but the difference was not statistically significant  
213 (193 vs. 191 mg/dL,  $P$ -value=0.51) (fig. 3A). In contrast, cases with SNBD had significantly  
214 higher serum Triglyceride levels than those without (132 vs. 118 mg/dL,  $P$ -value <0.001) (fig.  
215 3B).

216 • **Association between sleep and nighttime behavior and dyslipidemia**

217 At baseline, participants with hypercholesterolemia had 4% higher odds of SNBD but the  
218 results were not statistically significant (OR= 1.04, 95% CI: 0.83, 1.31,  $P$ -value=0.744). No  
219 statistical significance was observed after adjustment for confounding factors.  
220 Those with hypertriglyceridemia levels had 43% higher odds of SNBD at baseline (OR= 1.43,  
221 95% CI: 1.13, 1.80,  $P$ -value=0.003). The results remained statistically significant after  
222 adjustment for confounding factors (adj. OR=1.36, 95% CI: 1.06, 1.74,  $P$ -value=0.016) and after  
223 adding BMI to the adjusted model (BMI-adj. OR= 1.29, 95% CI: 1.00, 1.66,  $P$ -value=0.048). BMI  
224 and particularly obesity were significantly associated with higher odds of SNBD at baseline.  
225 No significant associations were found between hypercholesterolemia and  
226 hypertriglyceridemia with incident SNBD at 12 months of follow-up. Detailed results of the  
227 logistic regression were reported in Table 3.

228 **4. Discussion**

229 This study explored the association between dyslipidemia based on pathological Cholesterol  
230 or Triglyceride levels at baseline, and SNBD<sup>1</sup> reported by the study partner of included older  
231 participants at two time points.

232 The main outcome was the significant association between hypertriglyceridemia and sleep  
233 disorders in the cross-sectional analysis at baseline, even after adjusting for age, sex, racial  
234 profile, educational level, GDS total score, APOE  $\epsilon$ 4, cognition-related main diagnosis, and  
235 BMI.

236 • **Sleep duration and dyslipidemia**

237 Although insomnia is a well-recognized risk factor for cardiovascular and metabolic  
238 complications, (24, 25) the significant association between dyslipidemia and sleep disorders  
239 extends beyond sleep deprivation. Several population-based studies described a U-shaped  
240 association between sleep duration and serum lipid levels, where both short and long sleep  
241 durations were significantly associated with dyslipidemia. In people with longer sleep  
242 durations, high Triglyceride levels were commonly described. (26-28)

243 The novelty in the current study was the analysis of associations based on clinical cutoff values  
244 defining hypercholesterolemia or hypertriglyceridemia, and a binary outcome defining the  
245 existence or not of SNBD. Information on sleep hours was not part of the ADNI investigations,  
246 and the focus was SNBD as an outcome rather than sleep duration as an exposure.

247 • **Sleep quality and dyslipidemia**

248 In addition to the metabolic effect associated with the quantitative dimension of sleep, lipid  
249 levels might also be modulated by the subjective sleep quality. (14) Difficulty in maintaining  
250 sleep and excessive daytime sleepiness increased the odds of metabolic syndrome in the

251 elderly, independently of obesity and snoring. (29) Moreover, the consumption of sleep  
252 medication, a biomarker of sleep disorder severity, showed a significant association with  
253 elevated low-density lipoprotein-cholesterol (LDL-C). (30) Neither LDL-C nor high-density  
254 lipoprotein-C (HDL-C) were reported in the main ADNI laboratory data.

255 • **Sleep dysregulation and dyslipidemia**

256 Night work, sleep debt, and social jetlag present further risk factors impairing sleep  
257 homeostasis and are associated with dyslipidemia and cardiovascular risks. (31, 32) Amongst  
258 5,813 study participants from the Korean National Health and Nutrition Examination Survey  
259 (2013-2016), males exercising night work had 53% higher odds of being diagnosed with  
260 dyslipidemia. Compared to day-working male participants, male night workers who slept less  
261 than six hours and those who skipped meals had significantly higher odds of dyslipidemia. (33)

262 • **Sleep apnea syndrome and dyslipidemia**

263 The associations between OSA and metabolic syndrome, (34, 35) as well as the association  
264 between OSA and <sup>19</sup>triglyceride-glucose index, a biomarker of insulin resistance, (36) are well-  
265 described in the literature. Moreover, novel lipid indices, mainly <sup>12</sup>lipid accumulation product  
266 (LAP), visceral adiposity index (VAI), and atherogenic index of plasma (AIP) were found to be  
267 <sup>1</sup>higher in people with OSA than controls. (37) Thus, independent of the OSA diagnosis,  
268 frequent snoring was also associated with dyslipidemia and predicted linearly higher levels of  
269 Triglyceride in a large population study. (38)

270 • **Associations in younger patients**

271 The focus of the current study was the elderly with and without cognitive decline. But, the  
272 sleep-lipid association was described in younger age groups as well. Higher Triglyceride levels  
273 were also reported in adolescents with longer sleep hours, (39) and accelerometry-based

274 sleep clustering also showed that male adolescents with sleep irregularities had significantly  
275 higher Triglyceride levels. (40)

276 • **Longitudinal studies**

277 The second outcome was the absence of a significant association between dyslipidemia at  
278 baseline and incidental SNBD over a 12-month follow-up period.

279 While cross-sectional design is inadequate in inferring the causal relationship between sleep  
280 and dyslipidemia, longitudinal studies in older adults showed a bidirectional association  
281 between sleep duration and blood lipids. Total Cholesterol, LDL-C, HDL-C, and Triglycerides  
282 showed different temporal relationships with sleep duration. BMI and age were significant  
283 effect modifiers in this association. (41) In a longitudinal population-based cohort of healthy  
284 adults, short sleep duration increased the risk of metabolic syndrome, particularly  
285 hypertriglyceridemia by 9%. In comparison, long sleep duration decreased the risk of  
286 hypertriglyceridemia by 11%. (42)

287 • **Mechanisms**

288 The significant association between sleep disorders and higher Triglyceride levels might be  
289 explained by concomitant stress, frustration, and consequently eating irregularities. Stress  
290 and anxiety are associated with both sleep and eating disorders. (43) First, the association  
291 between sleep and stress is bidirectional; an increased emotional stress level might lead to  
292 sleep irregularities or insomnia, and sleep disorders might cause higher stress and frustration.  
293 (44) Sleep is crucial for emotion regulation and vice versa. (45, 46) Second, sleep disturbance  
294 interacts with hormone secretion and eating disorders. (47) Studies have shown that after  
295 sleep deprivation, people express eating and appetite dysregulation. (48, 49) Ghrelin, Leptin,  
296 and Adiponectin secretion patterns present a mediating effect on the association between  
297 sleep duration, and metabolic syndrome. (50, 51) Further, autoimmunity and

298 neuroinflammation are relevant mechanisms involved in the homeostatic dysregulation  
299 associated with sleep disorders, and higher inflammatory biomarkers might further impair  
300 metabolic function and energy regulation. (52) Finally, a genetic predisposition, particularly  
301 Apolipoprotein genes, might infer the association between sleep and dyslipidemia. (53)  
302 The sleep-lipid association was controversially discussed. Linear models seem insufficient to  
303 explain the association. (40) Moreover, published results were mainly different depending on  
304 the adjustment model used in the analysis. Noteworthy, adjusting for BMI and OSA led to the  
305 loss of the statistical significance of the association between sleep duration and quality on one  
306 side, and serum Triglyceride and hepatic Triglyceride content on another side. (16) It is known  
307 that BMI and OSA infer sleep quality and lipid levels and therefore might present a  
308 confounding effect on the path between sleep and dyslipidemia. This contradicts current  
309 results since associations remained statistically significant even after adjusting for BMI, and  
310 the questions on which the analysis of SNBD was based have mainly a behavioral aspect  
311 without considering respiratory symptoms.

- **Strengths**

312     • **Strengths**  
313     <sup>16</sup> The major strength of the study is the large number of included cases with high-quality and  
314 complete data. The study's inclusion criteria were very restrictive, and only complete cases  
315 were considered for the analysis, lowering the bias risk and giving the data a strong analytical  
316 value. Older adults tend to be less represented in epidemiological and molecular studies.  
317 Therefore, restricting the included population to advanced age groups is a further strength.  
318 <sup>24</sup> Older adults have a particularly higher risk of multimorbidity and poly medication. Reducing  
319 the risk of one factor might improve the prognosis of other health conditions. This helps lower  
320 health costs, in addition to reducing morbidity and mortality risks. Furthermore, the



321 combination of a cross-sectional and longitudinal design in the analyses allowed a better  
322 evaluation of the association's predictive value.

323 <sup>14</sup> This is the first study exploring the association between informant-reported SNBD and  
324 dyslipidemia. Most of the published data studied either OSA or self-reported sleep disorders.  
325 In older populations, the self-awareness of sleep quality might be impaired, and this study  
326 presents a further strength related to the partner-provided information on sleep-related  
327 behavior disorders.

328 A further strength is related to the fact that the study was based on results obtained from  
329 fasting blood. However, <sup>1</sup> a study on the association between sleep disturbances and  
330 Triglyceride levels in adolescents showed that the results were not affected by the fasting  
331 status of study participants and were statistically significant before and after stratifying by  
332 fasting during blood sampling. (40)

333 • <sup>1</sup> **Limitations**

334 Despite the interesting findings reported in this study, it is important to acknowledge some  
335 limitations.

336 The first limitation is related to the absence of information on LDL-C and HDL-C levels; both of  
337 which are relevant biomarkers of metabolic syndrome and dyslipidemia; but were not  
338 assessed in the main laboratory ADNI data. A further <sup>1</sup> limitation is related to the lack of  
339 information on comorbid <sup>22</sup> non-alcoholic fatty liver disease (NAFLD) or sarcopenia. Both of  
340 them are associated with sleep disorders. (54, 55) In this study, BMI was considered a solid  
341 surrogate biomarker for NAFLD, (56, 57) nutrition, and physical activity and was introduced to  
342 the adjusted models. Although BMI predicted independently sleep disorders in the  
343 univariable models, incorporating BMI in the adjusted models (Model 3) of Cholesterol and



344 then of Triglyceride did not impact the overall <sup>1</sup> statistical significance of the results.

345 Noteworthy, the association between hypertriglyceridemia and SNBD was not influenced by  
346 BMI as covariable and remained statistically significant.

<sup>1</sup>  
347 The second limitation is the absence of subjective data such as sleep duration or detailed  
348 polysomnographic measurements (Gold Standard). Furthermore, neither information on the  
349 objective description of the sleep quality reported by study participants, nor the presence or  
350 absence of obstructive sleep apnea were included. While those explorations are of high  
351 interest and might have enriched diagnostic methods and information used in the current  
352 study, they were largely explored in published data. The informant-based evaluation was  
353 favored, particularly because of its relevance in the elderly with cognitive impairment who  
354 might lack to some extent self-awareness and tend to over- or underestimate their sleep  
355 duration. The questionnaire was oriented toward sleep behavior disorders rather than  
356 breathing disorders and associated disturbances.

357 The third limitation is the lack of information on whether study participants were under lipid-  
358 regulating medications. Although this information could be relevant for evaluating the overall  
359 prevalence of dyslipidemia in the included sample, the main study objective was to investigate  
360 the association between pathological lipid levels at baseline as predicting variable and  
361 concomitant sleep disorders, independently of the potential medication effect.

362 Finally, the study is of predictive value and does not allow drawing causal inferences from the <sup>1</sup>  
363 association between dyslipidemia and SNBD.

#### 364 <sup>1</sup> 4. Conclusions

365 Hypertriglyceridemia, but not hypercholesterolemia, was associated with SNBD in older adults  
366 at baseline. This association was independent of BMI. However, <sup>1</sup> none of the dyslipidemia

367 forms did predict incidental cases of SNBD over a follow-up period of 12 months. The current  
368 study emphasizes the importance of systematic screening of sleep disorders in older patients  
369 and its adapted management in mitigating metabolic risks and preventing related  
370 cardiovascular complications. Informant-based interviews are helpful and provide  
371 complementary information on sleep disorders in older individuals with cognitive impairment.

372

9

### 373 **Declarations**

374 **Ethics approval and consent to participate:** Ethical approvals were obtained from local IRBs  
375 corresponding to every recruitment center of ADNI. Participants gave written consent.  
376 Information<sup>7</sup> can be found at <https://adni.loni.usc.edu>.

377 **Consent for publication:** Not applicable.

378 **Availability of data and materials:** Data<sup>18</sup> can be found at <https://adni.loni.usc.edu>.

379 **Competing interest:** None.

3

380 **Declaration of funding:** AH did not receive any specific grant from funding agencies in the  
381 public, commercial, or not-for-profit sector. Data collection and sharing for ADNI project was  
382 funded by the Alzheimer's Disease Neuroimaging Initiative (ADNI; National Institutes of  
383 Health Grant U19 AG024904). ADNI is made possible with funding from the NIH and private  
384 sector support detailed at <https://adni.loni.usc.edu/about/> and in the Acknowledgment part.

1

385 **Author contributions:** AH has full access to all of the data and takes responsibility for the  
386 integrity of the data and the accuracy of the analysis, visualization, drafting, and editing of the  
387 manuscript.

388 \*Data used in preparation of this article were obtained from the Alzheimer's Disease  
389 Neuroimaging Initiative (ADNI) database ([adni.loni.usc.edu](http://adni.loni.usc.edu)). As such, the investigators within

390 the ADNI contributed to the design and implementation of ADNI and/or provided data but  
391 did not participate in analysis or writing of this report. A complete listing of ADNI investigators  
392 can be found at: [http://adni.loni.usc.edu/wp-](http://adni.loni.usc.edu/wp-content/uploads/how_to_apply/ADNI_Acknowledgement_List.pdf)  
393 [content/uploads/how\\_to\\_apply/ADNI\\_Acknowledgement\\_List.pdf](http://adni.loni.usc.edu/wp-content/uploads/how_to_apply/ADNI_Acknowledgement_List.pdf)

<sup>1</sup>  
394 **Acknowledgments:** “Data collection and sharing for the Alzheimer's Disease Neuroimaging  
395 Initiative (ADNI) is funded by the National Institute on Aging (National Institutes of Health  
396 Grant U19 AG024904). The grantee organization is the Northern California Institute for  
397 Research and Education. In the past, ADNI has also received funding from the National  
398 Institute of Biomedical Imaging and Bioengineering, the Canadian Institutes of Health  
399 Research, and private sector contributions through the Foundation for the National Institutes  
400 of Health (FNIH) including generous contributions from the following: AbbVie, Alzheimer’s  
401 Association; Alzheimer’s Drug Discovery Foundation; Araclon Biotech; BioClinica, Inc.; Biogen;  
402 Bristol-Myers Squibb Company; CereSpir, Inc.; Cogstate; Eisai Inc.; Elan Pharmaceuticals, Inc.;  
403 Eli Lilly and Company; EuroImmun; F. Hoffmann-La Roche Ltd and its affiliated company  
404 Genentech, Inc.; Fujirebio; GE Healthcare; IXICO Ltd.; Janssen Alzheimer Immunotherapy  
405 Research & Development, LLC.; Johnson & Johnson Pharmaceutical Research &Development  
406 LLC.; Lumosity; Lundbeck; Merck & Co., Inc.; Meso Scale Diagnostics, LLC.; NeuroRx Research;  
407 Neurotrack Technologies; Novartis Pharmaceuticals Corporation; Pfizer Inc.; Piramal Imaging;  
408 Servier; Takeda Pharmaceutical Company; and Transition Therapeutics.”

409  
410  
411  
412

413 **References**

- 414 1. Sateia MJ. International Classification of Sleep Disorders-Third Edition. Chest.  
415 2014;146(5):1387-94.
- 416 2. The Lancet D, amp, Endocrinology. Sleep: a neglected public health issue. The Lancet  
417 Diabetes & Endocrinology. 2024;12(6):365.
- 418 3. Chen B, Vgontzas AN, Li Y. Good sleep and health. The Lancet Healthy Longevity.  
419 2023;4(7):e295-e6.
- 420 4. Siddiquee AT, Lee SK, Kim S, Lee MH, Kim HJ, Shin C. All-cause and major-cause  
421 mortality associated with sleep latency in the Korean Genome and Epidemiology Study  
422 (KoGES): a population-based prospective cohort study. Lancet Healthy Longev.  
423 2023;4(7):e316-e25.
- 424 5. Benjafield AV, Ayas NT, Eastwood PR, Heinzer R, Ip MSM, Morrell MJ, et al. Estimation  
425 of the global prevalence and burden of obstructive sleep apnoea: a literature-based analysis.  
426 The Lancet Respiratory Medicine. 2019;7(8):687-98.
- 427 6. Spinedi E, Cardinali DP. Neuroendocrine-Metabolic Dysfunction and Sleep  
428 Disturbances in Neurodegenerative Disorders: Focus on Alzheimer's Disease and Melatonin.  
429 Neuroendocrinology. 2019;108(4):354-64.
- 430 7. Hung CM, Li YC, Chen HJ, Lu K, Liang CL, Liliang PC, et al. Risk of dementia in patients  
431 with primary insomnia: a nationwide population-based case-control study. BMC Psychiatry.  
432 2018;18(1):38.
- 433 8. Yaffe K, Falvey CM, Hoang T. Connections between sleep and cognition in older adults.  
434 The Lancet Neurology. 2014;13(10):1017-28.

- 435 9. Sabia S, Fayosse A, Dumurgier J, van Hees VT, Paquet C, Sommerlad A, et al. Association  
436 of sleep duration in middle and old age with incidence of dementia. *Nature Communications*.  
437 2021;12(1):2289.
- 438 10. Oh JY, Walsh CM, Ranasinghe K, Mladinov M, Pereira FL, Petersen C, et al. Subcortical  
439 Neuronal Correlates of Sleep in Neurodegenerative Diseases. *JAMA Neurology*.  
440 2022;79(5):498-508.
- 441 11. Lim DC, Najafi A, Afifi L, Bassetti CLA, Buysse DJ, Han F, et al. The need to promote  
442 sleep health in public health agendas across the globe. *The Lancet Public Health*.  
443 2023;8(10):e820-e6.
- 444 12. Zhang S, Xie L, Yu H, Zhang W, Qian B. Association between nighttime-daytime sleep  
445 patterns and chronic diseases in Chinese elderly population: a community-based cross-  
446 sectional study. *BMC Geriatr*. 2019;19(1):124.
- 447 13. Alberti KGMM, Zimmet P, Shaw J. The metabolic syndrome—a new worldwide  
448 definition. *The Lancet*. 2005;366(9491):1059-62.
- 449 14. Okubo N, Matsuzaka M, Takahashi I, Sawada K, Sato S, Akimoto N, et al. Relationship  
450 between self-reported sleep quality and metabolic syndrome in general population. *BMC*  
451 *Public Health*. 2014;14:562.
- 452 15. Wang D, Chen J, Zhou Y, Ma J, Zhou M, Xiao L, et al. Association between sleep  
453 duration, sleep quality and hyperlipidemia in middle-aged and older Chinese: The Dongfeng-  
454 Tongji Cohort Study. *Eur J Prev Cardiol*. 2019;26(12):1288-97.
- 455 16. Bos MM, Noordam R, van den Berg R, de Mutsert R, Rosendaal FR, Blauw GJ, et al.  
456 Associations of sleep duration and quality with serum and hepatic lipids: The Netherlands  
457 Epidemiology of Obesity Study. *J Sleep Res*. 2019;28(4):e12776.

- 458 17. Zheng Y, Wang A, Pan C, Lu J, Dou J, Lu Z, et al. Impact of night sleep duration on  
459 glycemic and triglyceride levels in Chinese with different glycemic status. *J Diabetes*.  
460 2015;7(1):24-30.
- 461 18. von Elm E, Altman DG, Egger M, Pocock SJ, Gøtzsche PC, Vandenbroucke JP. The  
462 Strengthening the Reporting of Observational Studies in Epidemiology (STROBE) statement:  
463 guidelines for reporting observational studies. *The Lancet*. 2007;370(9596):1453-7.
- 464 19. Report of the National Cholesterol Education Program Expert Panel on Detection,  
465 Evaluation, and Treatment of High Blood Cholesterol in Adults. The Expert Panel. *Arch Intern*  
466 *Med*. 1988;148(1):36-69.
- 467 20. Third Report of the National Cholesterol Education Program (NCEP) Expert Panel on  
468 Detection, Evaluation, and Treatment of High Blood Cholesterol in Adults (Adult Treatment  
469 Panel III) Final Report. *Circulation*. 2002;106(25):3143-.
- 470 21. Cummings JL, Mega M, Gray K, Rosenberg-Thompson S, Carusi DA, Gornbein J. The  
471 Neuropsychiatric Inventory. *Neurology*. 1994;44(12):2308-.
- 472 22. Kaufer DI, Cummings JL, Ketchel P, Smith V, MacMillan A, Shelley T, et al. Validation of  
473 the NPI-Q, a Brief Clinical Form of the Neuropsychiatric Inventory. *The Journal of*  
474 *Neuropsychiatry and Clinical Neurosciences*. 2000;12(2):233-9.
- 475 23. Garrow JS, Webster J. Quetelet's index (W/H<sup>2</sup>) as a measure of fatness. *Int J Obes*.  
476 1985;9(2):147-53.
- 477 24. Lee MS, Shin JS, Lee J, Lee YJ, Kim MR, Park KB, et al. The association between mental  
478 health, chronic disease and sleep duration in Koreans: a cross-sectional study. *BMC Public*  
479 *Health*. 2015;15:1200.
- 480 25. Jin B, Zhang H, Song F, Wu G, Yang H. Interaction of sleep duration and depression on  
481 cardiovascular disease: a retrospective cohort study. *BMC Public Health*. 2022;22(1):1752.

- 482 26. Liu X, Huang L, Wu Q, Chen Y, Chen X, Chen H, et al. Sleep characteristic profiles and  
483 the correlation with spectrum of metabolic syndrome among older adult: a cross-sectional  
484 study. *BMC Geriatr.* 2022;22(1):414.
- 485 27. Du J, Chen Y, Zhou N, Song Y, Wang W, Hong X. Associations between self-reported  
486 sleep duration and abnormal serum lipids in eastern China: a population-based cross-  
487 sectional survey. *Sleep Med.* 2022;95:1-8.
- 488 28. Full KM, Gallo LC, Malhotra A, Bellettiere J, Kerr J, Arredondo E, et al. Modeling the  
489 cardiometabolic benefits of sleep in older women: exploring the 24-hour day. *Sleep.*  
490 2020;43(1).
- 491 29. Akbaraly TN, Jaussent I, Besset A, Bertrand M, Barberger-Gateau P, Ritchie K, et al.  
492 Sleep complaints and metabolic syndrome in an elderly population: the Three-City Study. *Am*  
493 *J Geriatr Psychiatry.* 2015;23(8):818-28.
- 494 30. Vozoris NT. Insomnia Symptoms Are Not Associated with Dyslipidemia: A Population-  
495 Based Study. *Sleep.* 2016;39(3):551-8.
- 496 31. Cabeza de Baca T, Chayama KL, Redline S, Slopen N, Matsushita F, Prather AA, et al.  
497 Sleep debt: the impact of weekday sleep deprivation on cardiovascular health in older women.  
498 *Sleep.* 2019;42(10).
- 499 32. Sládek M, Klusáček J, Hamplová D, Sumová A. Population-representative study reveals  
500 cardiovascular and metabolic disease biomarkers associated with misaligned sleep schedules.  
501 *Sleep.* 2023;46(6).
- 502 33. Joo JH, Lee DW, Choi DW, Park EC. Association between night work and dyslipidemia  
503 in South Korean men and women: a cross-sectional study. *Lipids Health Dis.* 2019;18(1):75.



- 504 34. Geovanini GR, Wang R, Weng J, Jenny NS, Shea S, Allison M, et al. Association between  
505 Obstructive Sleep Apnea and Cardiovascular Risk Factors: Variation by Age, Sex, and Race. The  
506 Multi-Ethnic Study of Atherosclerosis. *Ann Am Thorac Soc*. 2018;15(8):970-7.
- 507 35. Toyama Y, Chin K, Chihara Y, Takegami M, Takahashi KI, Sumi K, et al. Association  
508 between sleep apnea, sleep duration, and serum lipid profile in an urban, male, working  
509 population in Japan. *Chest*. 2013;143(3):720-8.
- 510 36. Behnoush AH, Khalaji A, Ghondaghsaz E, Masrouf M, Shokri Varniab Z, Khalaji S, et al.  
511 Triglyceride-glucose index and obstructive sleep apnea: a systematic review and meta-  
512 analysis. *Lipids in Health and Disease*. 2024;23(1):4.
- 513 37. Behnoush AH, Bahiraie P, Shokri Varniab Z, Foroutani L, Khalaji A. Composite lipid  
514 indices in patients with obstructive sleep apnea: a systematic review and meta-analysis. *Lipids*  
515 *Health Dis*. 2023;22(1):84.
- 516 38. Tian Y, Li D, Mu H, Wei S, Guo D. Positive correlation between snoring and dyslipidemia  
517 in adults: results from NHANES. *Lipids Health Dis*. 2023;22(1):73.
- 518 39. Anni NS, Jung SJ, Shim JS, Jeon YW, Lee GB, Kim HC. Stressful life events and serum  
519 triglyceride levels: the Cardiovascular and Metabolic Diseases Etiology Research Center cohort  
520 in Korea. *Epidemiol Health*. 2021;43:e2021042.
- 521 40. Wang M, Flexeder C, Harris CP, Thiering E, Koletzko S, Bauer CP, et al. Accelerometry-  
522 assessed sleep clusters and cardiometabolic risk factors in adolescents. *Obesity (Silver Spring)*.  
523 2024;32(1):200-13.
- 524 41. Chen Z, Zhang X, Duan Y, Mo T, Liu W, Ma Y, et al. The Relationship Between Sleep  
525 Duration and Blood Lipids Among Chinese Middle-Aged and Older Adults: Cross-Lagged Path  
526 Analysis From CHARLS. *Front Public Health*. 2022;10:868059.



- 527 42. Deng HB, Tam T, Zee BC, Chung RY, Su X, Jin L, et al. Short Sleep Duration Increases  
528 Metabolic Impact in Healthy Adults: A Population-Based Cohort Study. *Sleep*. 2017;40(10).
- 529 43. Ong SH, Wickramaratne P, Tang M, Weissman MM. Early childhood sleep and eating  
530 problems as predictors of adolescent and adult mood and anxiety disorders. *J Affect Disord*.  
531 2006;96(1-2):1-8.
- 532 44. Balter LJT, Sundelin T, Axelsson J. Sickness and sleep health predict frustration and  
533 affective responses to a frustrating trigger. *Sci Rep*. 2021;11(1):1542.
- 534 45. Palmer CA, Alfano CA. Sleep and emotion regulation: An organizing, integrative review.  
535 *Sleep Medicine Reviews*. 2017;31:6-16.
- 536 46. Demichelis OP, Grainger SA, Burr L, Henry JD. Emotion regulation mediates the effects  
537 of sleep on stress and aggression. *Journal of Sleep Research*. 2023;32(3):e13787.
- 538 47. Mehr JB, Mitchison D, Bowrey HE, James MH. Sleep dysregulation in binge eating  
539 disorder and “food addiction”: the orexin (hypocretin) system as a potential neurobiological  
540 link. *Neuropsychopharmacology*. 2021;46(12):2051-61.
- 541 48. Barragán R, Zuraikat FM, Tam V, RoyChoudhury A, St-Onge MP. Changes in eating  
542 patterns in response to chronic insufficient sleep and their associations with diet quality: a  
543 randomized trial. *J Clin Sleep Med*. 2023;19(11):1867-75.
- 544 49. Liu S, Wang X, Zheng Q, Gao L, Sun Q. Sleep Deprivation and Central Appetite  
545 Regulation. *Nutrients*. 2022;14(24).
- 546 50. Li L, Fu J, Yu XT, Li G, Xu L, Yin J, et al. Sleep Duration and Cardiometabolic Risk Among  
547 Chinese School-aged Children: Do Adipokines Play a Mediating Role? *Sleep*. 2017;40(5).
- 548 51. Chaput JP, McHill AW, Cox RC, Broussard JL, Dutil C, da Costa BGG, et al. The role of  
549 insufficient sleep and circadian misalignment in obesity. *Nat Rev Endocrinol*. 2023;19(2):82-  
550 97.

- 551 52. Nowakowski S, Matthews KA, von Känel R, Hall MH, Thurston RC. Sleep characteristics  
552 and inflammatory biomarkers among midlife women. *Sleep*. 2018;41(5).
- 553 53. Yang L, Ma L, Guo W, Fang Q, Lai X, Zhang X. Interaction of polymorphisms in APOA4-  
554 APOA5-ZPR1-BUD13 gene cluster and sleep duration on 5-year lipid changes in middle aged  
555 and older Chinese. *Sleep*. 2019;42(8).
- 556 54. <sup>4</sup> Wei Y-T, Lee P-Y, Lin C-Y, Chen H-J, Lin C-C, Wu J-S, et al. Non-alcoholic fatty liver disease  
557 among patients with sleep disorders: a Nationwide study of Taiwan. *BMC Gastroenterology*.  
558 2020;20(1):32.
- 559 55. <sup>4</sup> Liu K, Luo J, Chen Y, Li B, Tian Y, Wang X, <sup>7</sup> et al. Association between sarcopenia and  
560 sleep disorders: a cross-sectional population based study. *Front Nutr*. 2024;11:1415743.
- 561 56. <sup>10</sup> Fan R, Wang J, Du J. Association between body mass index and fatty liver risk: A dose-  
562 response analysis. *Scientific Reports*. 2018;8(1):15273.
- 563 57. <sup>5</sup> Wang M, Chang M, Shen P, Wei W, Li H, Shen G. Application value of triglyceride-  
564 glucose index and triglyceride-glucose body mass index in evaluating the degree of hepatic  
565 steatosis in non-alcoholic fatty liver disease. *Lipids in Health and Disease*. 2023;22(1):186.
- 566
- 567
- 568
- 569
- 570
- 571
- 572
- 573
- 574

575 **Captions**

1

576 **Tables**

577 **Table 1:** Characteristics of the study population and comparison between healthy controls,  
578 and those with MCI and dementia

579 **Table 2:** Comparison between study participants with and without dyslipidemia

580 **Table 3:** Association between sleep and nighttime behavior and dyslipidemia at baseline and  
581 12 months follow-up

582

583 **Figures**

584 **Figure 1:** Characteristics of the study population

585 Figure 1 A: Chart flow of included studies

586 Figure 1 B: Classification of cases during study follow-up

587 **Figure 2:** BMI categories and correlation analyses

588 Figure 2 A: Spearman correlation plot

589 Figure 2 B: Median age across different BMI categories

590 Figure 2 C: Spearman correlation between Cholesterol and BMI

591 Figure 2 D: Spearman correlation between Triglyceride and BMI

592 **Figure 3:** Dyslipidemia and sleep disorders

593 Figure 3 A: Cholesterol levels and sleep disorders

594 Figure 3 B: Triglyceride levels and sleep disorders

595

596

**Table 1:** Characteristics of the study population and comparison between healthy controls, and those with MCI and dementia

| Characteristic                     | N     | Overall,<br>N = 2,216 <sup>1</sup> | Healthy controls<br>N = 786 <sup>1</sup> | MCI<br>N = 1,060 <sup>1</sup> | Dementia<br>N = 370 <sup>1</sup> | P-value <sup>2</sup> |
|------------------------------------|-------|------------------------------------|------------------------------------------|-------------------------------|----------------------------------|----------------------|
| Age (years)                        | 2,216 | 73 (68, 78)                        | 72 (68, 77)                              | 73 (68, 78)                   | 75 (70, 80)                      | <0.001               |
| Sex                                | 2,216 |                                    |                                          |                               |                                  | <0.001               |
| Female                             |       | 1,045 (47%)                        | 440 (56%)                                | 442 (42%)                     | 163 (44%)                        |                      |
| Male                               |       | 1,171 (53%)                        | 346 (44%)                                | 618 (58%)                     | 207 (56%)                        |                      |
| 3 Educational level (years)        | 2,216 | 16.00 (14.00, 18.00)               | 16.00 (15.00, 18.00)                     | 16.00 (14.00, 18.00)          | 16.00 (13.00, 18.00)             | <0.001               |
| Marital status                     | 2,216 |                                    |                                          |                               |                                  | <0.001               |
| Currently married                  |       | 1,673 (75%)                        | 547 (70%)                                | 815 (77%)                     | 311 (84%)                        |                      |
| 3 Currently not married or unknown |       | 543 (25%)                          | 239 (30%)                                | 245 (23%)                     | 59 (16%)                         |                      |
| Home                               | 2,216 |                                    |                                          |                               |                                  | 0.8                  |
| House or apartment                 |       | 2,101 (95%)                        | 748 (95%)                                | 1,006 (95%)                   | 347 (94%)                        |                      |
| Retirement or nursing institution  |       | 76 (3.4%)                          | 26 (3.3%)                                | 34 (3.2%)                     | 16 (4.3%)                        |                      |
| 9 Other                            |       | 39 (1.8%)                          | 12 (1.5%)                                | 20 (1.9%)                     | 7 (1.9%)                         |                      |
| Racial profile                     | 2,216 |                                    |                                          |                               |                                  | <0.001               |
| White                              |       | 1,952 (88%)                        | 651 (83%)                                | 963 (91%)                     | 338 (91%)                        |                      |
| Black                              |       | 167 (7.5%)                         | 92 (12%)                                 | 56 (5.3%)                     | 19 (5.1%)                        |                      |
| Other                              |       | 97 (4.4%)                          | 43 (5.5%)                                | 41 (3.9%)                     | 13 (3.5%)                        |                      |
| APOE ε4 status                     | 2,031 |                                    |                                          |                               |                                  | <0.001               |
| 0 allele                           |       | 1,095 (54%)                        | 488 (70%)                                | 495 (50%)                     | 112 (32%)                        |                      |
| 1 allele                           |       | 735 (36%)                          | 188 (27%)                                | 378 (39%)                     | 169 (48%)                        |                      |
| 2 alleles                          |       | 201 (9.9%)                         | 22 (3.2%)                                | 108 (11%)                     | 71 (20%)                         |                      |
| Missing values                     |       | 185                                | 88                                       | 79                            | 18                               |                      |
| ADAS <sub>13</sub> total score     | 2,216 | 14 (9, 22)                         | 8 (5, 12)                                | 16 (11, 21)                   | 29 (24, 34)                      | <0.001               |
| MMSE total score                   | 2,216 | 28.00 (26.00, 29.00)               | 29.00 (29.00, 30.00)                     | 28.00 (26.00, 29.00)          | 23.00 (21.00, 25.00)             | <0.001               |
| CDR-SB                             | 2,216 | 1.00 (0.00, 2.00)                  | 0.00 (0.00, 0.00)                        | 1.50 (1.00, 2.00)             | 4.50 (3.50, 5.00)                | <0.001               |
| FAQ total score                    | 2,211 | 1.0 (0.0, 5.0)                     | 0.0 (0.0, 0.0)                           | 1.0 (0.0, 5.0)                | 13.0 (8.0, 18.0)                 | <0.001               |
| Missing values                     |       | 5                                  | 0                                        | 4                             | 1                                |                      |
| GDS total score                    | 2,216 | 1.00 (0.00, 2.00)                  | 0.00 (0.00, 1.00)                        | 1.00 (1.00, 3.00)             | 1.00 (1.00, 3.00)                | <0.001               |
| 20 Cholesterol levels (mg/dL)      | 2,216 | 26.3 (23.9, 29.3)                  | 26.7 (24.1, 30.0)                        | 26.3 (24.0, 29.2)             | 25.4 (23.1, 28.0)                | <0.001               |
| Triglyceride levels (mg/dL)        | 2,216 | 191 (165, 220)                     | 189 (165, 217)                           | 191 (165, 221)                | 193 (167, 224)                   | 0.4                  |
| Sleep disorders at baseline        | 2,216 | 120 (87, 171)                      | 116 (85, 164)                            | 121 (86, 177)                 | 124 (93, 171)                    | 0.078                |
| Sleep disorders at 12 months       | 1,845 | 357 (16%)                          | 80 (10%)                                 | 193 (18%)                     | 84 (23%)                         | <0.001               |
| Missing values                     |       | 371                                | 141                                      | 163                           | 71 (23%)                         | <0.001               |

1

<sup>1</sup> Median (IQR); n (%), <sup>2</sup> Kruskal-Wallis rank sum test; Pearson's Chi-squared test

**ADAS-13:** Alzheimer's Disease Assessment Score – 13 items - **APOE ε4:** Apolipoprotein E ε4 – **BMI:** Body-Mass Index (Weight in Kg / (Height in m)<sup>2</sup>) - **CDR-SB:** Clinical Dementia Rating Scale - sum of boxes - **FAQ:** Functional Activities Questionnaire - **GDS:** Geriatric Depression Scale – **MCI:** Mild Cognitive Impairment - **MMSE:** Mini-Mental Status Examination

**Table 2: Comparison between study participants with and without dyslipidemia**

**Characteristic** **\*\* Hypercholesterolemia \*\*** **\*\* Hypertriglyceridemia \*\***

|                                   | Normal<br>(<200 mg/dL)<br>N = 1,296 <sup>1</sup> | High<br>(≥200 mg/dL)<br>N = 920 <sup>1</sup> | P-value <sup>2</sup> | Normal<br>(<150 mg/dL)<br>N = 1,491 <sup>1</sup> | High<br>(≥150 mg/dL)<br>N = 725 <sup>1</sup> | P-value <sup>2</sup> |
|-----------------------------------|--------------------------------------------------|----------------------------------------------|----------------------|--------------------------------------------------|----------------------------------------------|----------------------|
| <b>Age (years)</b>                | 74 (69, 79)                                      | 72 (67, 78)                                  | <0.001               | 73 (68, 78)                                      | 73 (67, 78)                                  | 0.3                  |
| <b>Sex</b>                        |                                                  |                                              | <0.001               |                                                  |                                              | 0.4                  |
| Female                            | 453 (35%)                                        | 592 (64%)                                    |                      | 713 (48%)                                        | 332 (46%)                                    |                      |
| Male                              | 843 (65%)                                        | 328 (36%)                                    |                      | 778 (52%)                                        | 393 (54%)                                    |                      |
| <b>Main cognitive diagnosis</b>   |                                                  |                                              | 0.6                  |                                                  |                                              | 0.3                  |
| Healthy controls                  | 465 (36%)                                        | 321 (35%)                                    |                      | 543 (36%)                                        | 243 (34%)                                    |                      |
| MCI                               | 623 (48%)                                        | 437 (48%)                                    |                      | 698 (47%)                                        | 362 (50%)                                    |                      |
| Dementia                          | 208 (16%)                                        | 162 (18%)                                    |                      | 250 (17%)                                        | 120 (17%)                                    |                      |
| <b>Educational level (years)</b>  | 16.00 (14.00, 18.00)                             | 16.00 (14.00, 18.00)                         | 0.4                  | 16.00 (14.00, 18.00)                             | 16.00 (14.00, 18.00)                         | <0.001               |
| <b>Marital status</b>             |                                                  |                                              | 0.004                |                                                  |                                              | 0.6                  |
| Currently married                 | 1,007 (78%)                                      | 666 (72%)                                    |                      | 1,131 (76%)                                      | 542 (75%)                                    |                      |
| Currently not married or unknown  | 289 (22%)                                        | 254 (28%)                                    |                      | 360 (24%)                                        | 183 (25%)                                    |                      |
| <b>Home</b>                       |                                                  |                                              | 0.4                  |                                                  |                                              | 0.5                  |
| Use or apartment                  | 1,230 (95%)                                      | 871 (95%)                                    |                      | 1,419 (95%)                                      | 682 (94%)                                    |                      |
| Retirement or nursing institution | 47 (3.6%)                                        | 29 (3.2%)                                    |                      | 47 (3.2%)                                        | 29 (4.0%)                                    |                      |
| Other                             | 19 (1.5%)                                        | 20 (2.2%)                                    |                      | 25 (1.7%)                                        | 14 (1.9%)                                    |                      |
| <b>Racial profile</b>             |                                                  |                                              | 0.6                  |                                                  |                                              | <0.001               |
| White                             | 1,140 (88%)                                      | 812 (88%)                                    |                      | 1,294 (87%)                                      | 658 (91%)                                    |                      |
| Black                             | 95 (7.3%)                                        | 72 (7.8%)                                    |                      | 137 (9.2%)                                       | 30 (4.1%)                                    |                      |
| Other                             | 61 (4.7%)                                        | 36 (3.9%)                                    |                      | 60 (4.0%)                                        | 37 (5.1%)                                    |                      |
| <b>APOE ε4 status</b>             |                                                  |                                              | 0.024                |                                                  |                                              | 0.3                  |
| 0 allele                          | 663 (56%)                                        | 432 (51%)                                    |                      | 727 (53%)                                        | 368 (55%)                                    |                      |
| 1 allele                          | 411 (35%)                                        | 324 (38%)                                    |                      | 489 (36%)                                        | 246 (37%)                                    |                      |
| 2 alleles                         | 104 (8.8%)                                       | 97 (11%)                                     |                      | 145 (11%)                                        | 56 (8.4%)                                    |                      |
| Missing values                    | 118                                              | 67                                           |                      | 130                                              | 55                                           |                      |
| <b>ADAS13 total score</b>         | 14 (9, 21)                                       | 14 (8, 22)                                   | 0.059                | 14 (9, 21)                                       | 14 (9, 22)                                   | 0.4                  |
| <b>MMSE total score</b>           | 28.00 (26.00, 29.00)                             | 28.00 (26.00, 30.00)                         | >0.9                 | 28.00 (26.00, 29.00)                             | 28.00 (26.00, 29.00)                         | 0.2                  |
| <b>DR-SB</b>                      | 1.00 (0.00, 2.00)                                | 1.00 (0.00, 2.50)                            | 0.4                  | 1.00 (0.00, 2.00)                                | 1.00 (0.00, 2.50)                            | 0.081                |
| <b>FA1 total score</b>            | 1.0 (0.0, 5.0)                                   | 1.0 (0.0, 5.0)                               | 0.7                  | 0.0 (0.0, 5.0)                                   | 1.0 (0.0, 6.0)                               | 0.028                |
| Missing values                    | 1                                                | 4                                            |                      | 4                                                | 1                                            |                      |
| <b>GDS total score</b>            | 1.00 (0.00, 2.00)                                | 1.00 (0.00, 2.00)                            | 0.7                  | 1.00 (0.00, 2.00)                                | 1.00 (0.00, 2.00)                            | <0.001               |
| <b>MI</b>                         | 26.7 (24.4, 29.8)                                | 25.5 (23.1, 28.7)                            | <0.001               | 25.7 (23.4, 28.6)                                | 27.5 (25.1, 30.9)                            | <0.001               |
| <b>Cholesterol (mg/dL)</b>        | 170 (151, 184)                                   | 225 (212, 246)                               | <0.001               | 187 (162, 216)                                   | 197 (172, 227)                               | <0.001               |
| <b>Triglyceride (mg/dL)</b>       | 115 (84, 162)                                    | 127 (92, 183)                                | <0.001               | 98 (76, 120)                                     | 203 (172, 255)                               | <0.001               |

**1 Sleep disorders at baseline**

**Sleep disorders at 12 months**

|                |           |           |     |           |           |              |
|----------------|-----------|-----------|-----|-----------|-----------|--------------|
| Missing values | 215       | 151 (16%) | 0.7 | 216 (14%) | 141 (19%) | <b>0.003</b> |
|                | 188 (17%) | 139 (18%) | 0.7 | 199 (16%) | 128 (21%) | <b>0.025</b> |
|                | 206 (16%) |           |     | 270       |           |              |

<sup>1</sup> Median (IQR); n (%) - <sup>2</sup> Wilcoxon rank sum test; Pearson's Chi-squared test

**ADAS-13:** Alzheimer's Disease Assessment Score – 13 items - **APOE ε4:** Apolipoprotein E ε4 – **BMI:** Body-Mass Index (Weight in Kg / (Height in m)<sup>2</sup>) - **CDR-SB:** Clinical Dementia Rating Scale - sum of boxes - **FAQ:** Functional Activities Questionnaire - **GDS:** Geriatric Depression Scale – **MCI:** Mild Cognitive Impairment - **MMSE:** Mini-Mental Status Examination

**Table 3:** Association between sleep and nighttime behavior and dyslipidemia at baseline and 12 months follow-up

| Characteristic                                                                      | Model 1 |       |                                        | Model 2      |       |       | Model 3                                |              |       |       |                                        |              |
|-------------------------------------------------------------------------------------|---------|-------|----------------------------------------|--------------|-------|-------|----------------------------------------|--------------|-------|-------|----------------------------------------|--------------|
|                                                                                     | N       | Event | OR <sup>1</sup> (95% CI <sup>1</sup> ) | P-value      | N     | Event | OR <sup>1</sup> (95% CI <sup>1</sup> ) | P-value      | N     | Event | OR <sup>1</sup> (95% CI <sup>1</sup> ) | P-value      |
| <b>C<sub>1</sub></b> <b>Cholesterol</b><br>Normal (<200 mg/dL)<br>High (≥200 mg/dL) | 2,216   | 357   | —                                      | 0.744        | 2,031 | 335   | —                                      | 0.412        | 2,031 | 335   | —                                      | 0.571        |
|                                                                                     |         |       | 1.04 (0.83, 1.31)                      |              |       |       | 0.90 (0.70, 1.16)                      |              |       |       | 0.93 (0.72, 1.20)                      |              |
| <b>Triglyceride</b><br>Normal (<150 mg/dL)<br>High (≥150 mg/dL)                     | 2,216   | 357   | —                                      | <b>0.003</b> | 2,031 | 335   | —                                      | <b>0.016</b> | 2,031 | 335   | —                                      | <b>0.048</b> |
|                                                                                     |         |       | 1.43 (1.13, 1.80)                      |              |       |       | 1.36 (1.06, 1.74)                      |              |       |       | 1.29 (1.00, 1.66)                      |              |
| <b>BMI</b>                                                                          | 2,216   | 357   | 1.03 (1.00, 1.05)                      | <b>0.030</b> | 2,031 | 335   | 1.03 (1.01, 1.06)                      | <b>0.008</b> | —     | —     | —                                      | —            |
| <b>BMI categories</b>                                                               | 2,216   | 357   | —                                      | 0.095        | 2,031 | 335   | —                                      | <b>0.029</b> | —     | —     | —                                      | —            |
| Healthy Weight                                                                      |         |       | —                                      | —            |       |       | —                                      | —            |       |       | —                                      | —            |
| Underweight                                                                         |         |       | 1.12 (0.26, 3.43)                      | 0.857        |       |       | 0.95 (0.21, 2.99)                      | 0.934        |       |       | —                                      | —            |
| Overweight                                                                          |         |       | 1.12 (0.86, 1.47)                      | 0.391        |       |       | 1.14 (0.86, 1.51)                      | 0.371        |       |       | —                                      | —            |
| Obesity                                                                             |         |       | 1.47 (1.09, 1.99)                      | <b>0.012</b> |       |       | 1.65 (1.18, 2.29)                      | <b>0.003</b> |       |       | —                                      | —            |
| <b>Incident sleep disorders at 12 months follow-up</b>                              |         |       |                                        |              |       |       |                                        |              |       |       |                                        |              |
| <b>C<sub>1</sub></b> <b>Cholesterol</b><br>Normal (<200 mg/dL)<br>High (≥200 mg/dL) | 1,550   | 187   | —                                      | 0.719        | 1,468 | 178   | —                                      | 0.641        | 1,468 | 178   | —                                      | 0.706        |
|                                                                                     |         |       | 1.06 (0.77, 1.44)                      |              |       |       | 1.08 (0.77, 1.52)                      |              |       |       | 1.07 (0.76, 1.50)                      |              |
| <b>Triglyceride</b><br>Normal (<150 mg/dL)<br>High (≥150 mg/dL)                     | 1,550   | 187   | —                                      | 0.066        | 1,468 | 178   | —                                      | 0.167        | 1,468 | 178   | —                                      | 0.122        |
|                                                                                     |         |       | 1.35 (0.98, 1.85)                      |              |       |       | 1.27 (0.90, 1.76)                      |              |       |       | 1.31 (0.93, 1.83)                      |              |
| <b>BMI</b>                                                                          | 1,550   | 187   | 0.98 (0.95, 1.01)                      | 0.202        | 1,468 | 178   | 0.98 (0.95, 1.02)                      | 0.417        | —     | —     | —                                      | —            |
| <b>BMI categories</b>                                                               | 1,550   | 187   | —                                      | <b>0.046</b> | 1,468 | 178   | —                                      | 0.090        | —     | —     | —                                      | —            |
| Healthy Weight                                                                      |         |       | —                                      | —            |       |       | —                                      | —            |       |       | —                                      | —            |
| Underweight                                                                         |         |       | 4.81 (1.23, 16.4)                      | <b>0.014</b> |       |       | 4.15 (1.04, 14.6)                      | <b>0.030</b> |       |       | —                                      | —            |
| Overweight                                                                          |         |       | 1.34 (0.95, 1.90)                      | 0.101        |       |       | 1.35 (0.93, 1.95)                      | 0.114        |       |       | —                                      | —            |
| Obesity                                                                             |         |       | 0.97 (0.61, 1.51)                      | 0.891        |       |       | 1.02 (0.62, 1.66)                      | 0.941        |       |       | —                                      | —            |

<sup>1</sup> OR = Odds Ratio, CI = Confidence Interval, BMI = Body Mass Index

**Model 1:** crude logistic regression analysis, **Model 2:** adjusted for age, sex, racial profile, educational level, cognition-related main diagnosis, geriatric depression scale total score, APOE ε4 status, **Model 3:** model 2 + BMI



# Sleep and nighttime behavior disorders in older adults: associations with hypercholesterolemia and hypertriglyceridemia at baseline and a prediction analysis of incidental cases at 12 months follow-up

ORIGINALITY REPORT

# 74%

SIMILARITY INDEX

PRIMARY SOURCES

- 1** Asma Hallab. "High serum Cholesterol and Triglyceride levels in older adults: associations with sleep and nighttime behavior disorders at baseline and a prediction analysis of incidental cases at 12 months follow-up", Cold Spring Harbor Laboratory, 2024  
Crossref Posted Content 5914 words — 66%
- 2** [sciety.org](https://www.sciety.org)  
Internet 213 words — 2%
- 3** Asma Hallab. "Sex-modulated association between thyroid stimulating hormone and informant-perceived anxiety in non-depressed older adults: prediction models and relevant cutoff value", Cold Spring Harbor Laboratory, 2024  
Crossref Posted Content 117 words — 1%
- 4** [www.frontiersin.org](https://www.frontiersin.org)  
Internet 50 words — 1%
- 5** [cardiab.biomedcentral.com](https://cardiab.biomedcentral.com)  
Internet 41 words — < 1%

|    |                                                                                                                                                                                                                                                                                                           |                 |
|----|-----------------------------------------------------------------------------------------------------------------------------------------------------------------------------------------------------------------------------------------------------------------------------------------------------------|-----------------|
| 6  | Amir Hossein Behnoush, Asma Mousavi, Elina Ghondaghsaz, Shayan Shojaei, Alessandro Cannavo, Amirmohammad Khalaji. "The importance of assessing the triglyceride-glucose index (TyG) in patients with depression: A systematic review", <i>Neuroscience &amp; Biobehavioral Reviews</i> , 2024<br>Crossref | 35 words — < 1% |
| 7  | <a href="http://www.researchsquare.com">www.researchsquare.com</a><br>Internet                                                                                                                                                                                                                            | 35 words — < 1% |
| 8  | <a href="http://lipidworld.biomedcentral.com">lipidworld.biomedcentral.com</a><br>Internet                                                                                                                                                                                                                | 33 words — < 1% |
| 9  | Asma Hallab. "Sex-, and neurodegeneration-dependent effect modification in the association between thyroid function and cognitive impairment in non-depressed, non-demented elderly", Cold Spring Harbor Laboratory, 2024<br>Crossref Posted Content                                                      | 31 words — < 1% |
| 10 | <a href="http://www.biomedicineonline.org">www.biomedicineonline.org</a><br>Internet                                                                                                                                                                                                                      | 24 words — < 1% |
| 11 | <a href="http://bio-protocol.org">bio-protocol.org</a><br>Internet                                                                                                                                                                                                                                        | 16 words — < 1% |
| 12 | <a href="http://discovery.researcher.life">discovery.researcher.life</a><br>Internet                                                                                                                                                                                                                      | 16 words — < 1% |
| 13 | <a href="http://dergipark.org.tr">dergipark.org.tr</a><br>Internet                                                                                                                                                                                                                                        | 11 words — < 1% |
| 14 | <a href="http://pubmed.ncbi.nlm.nih.gov">pubmed.ncbi.nlm.nih.gov</a><br>Internet                                                                                                                                                                                                                          | 10 words — < 1% |

- 
- 15 Bloniecki Kallio, Victor. "Using CSF Biomarkers to Understand Mechanisms of Behavioral Changes and Effects of Drug Treatment in Dementia.", Karolinska Institutet (Sweden), 2021  
ProQuest 9 words — < 1%
- 
- 16 Tesfaye, Rackeb. "The Interplay Between Sleep, Cognition, and Copy Number Variations in Autism Spectrum Disorder.", McGill University (Canada), 2023  
ProQuest 9 words — < 1%
- 
- 17 Shanker Swaminathan. "Amyloid pathway-based candidate gene analysis of [11C]PiB-PET in the Alzheimer's Disease Neuroimaging Initiative (ADNI) cohort", Brain Imaging and Behavior, 09/08/2011  
Crossref 8 words — < 1%
- 
- 18 Tissot, Cécile. "The Impact of Tau Biomarkers in the A/T/(N) Framework of Alzheimer's Disease", McGill University (Canada), 2023  
ProQuest 8 words — < 1%
- 
- 19 ibdigital.uib.es  
Internet 8 words — < 1%
- 
- 20 journals.plos.org  
Internet 8 words — < 1%
- 
- 21 ouci.dntb.gov.ua  
Internet 8 words — < 1%
- 
- 22 pesquisa.bvsalud.org  
Internet 8 words — < 1%
- 
- 23 worldwidescience.org  
Internet 8 words — < 1%

---

24

[www.science.gov](http://www.science.gov)

Internet

8 words — < 1%

---

25

Sepideh Shokouhi, John W. Mckay, Suzanne L. Baker, Hakmook Kang et al. "Reference tissue normalization in longitudinal 18F-florbetapir positron emission tomography of late mild cognitive impairment", *Alzheimer's Research & Therapy*, 2016

Crossref

6 words — < 1%

---

EXCLUDE QUOTES      OFF

EXCLUDE BIBLIOGRAPHY      OFF

EXCLUDE SOURCES      OFF

EXCLUDE MATCHES      OFF
